# Supplementary material for: Gram-selective antibacterial peptide hydrogels
Source: Royal Society of Chemistry journal article supplement (doi:10.1039/d2bm00558a), 2022-01-01
Supplement: d2bm00558a1.pdf [file d2bm00558a1.pdf]

## Electronic Supplementary Information

### Gram-Selective Antibacterial Peptide Hydrogels

Yangqian Hou<sup>a, b, c</sup>, Tingyuan Tan<sup>a, b, c</sup>, Zhen Guo<sup>a, b, c</sup>, Yuwen Ji<sup>a, b, c</sup>, Jun Hu<sup>a, b</sup>, Yi Zhang<sup>a, b\*</sup>

a. Key Laboratory of Interfacial Physics and Technology, Shanghai Institute of Applied Physics, Chinese Academy of Sciences, Shanghai 201800, China.

b. Zhangjiang Lab, Shanghai Advanced Research Institute, Chinese Academy of Sciences, Shanghai 201210, China.

c. University of Chinese Academy of Sciences, Beijing 100049, China.

\*Email: zhangyi@sinap.ac.cn

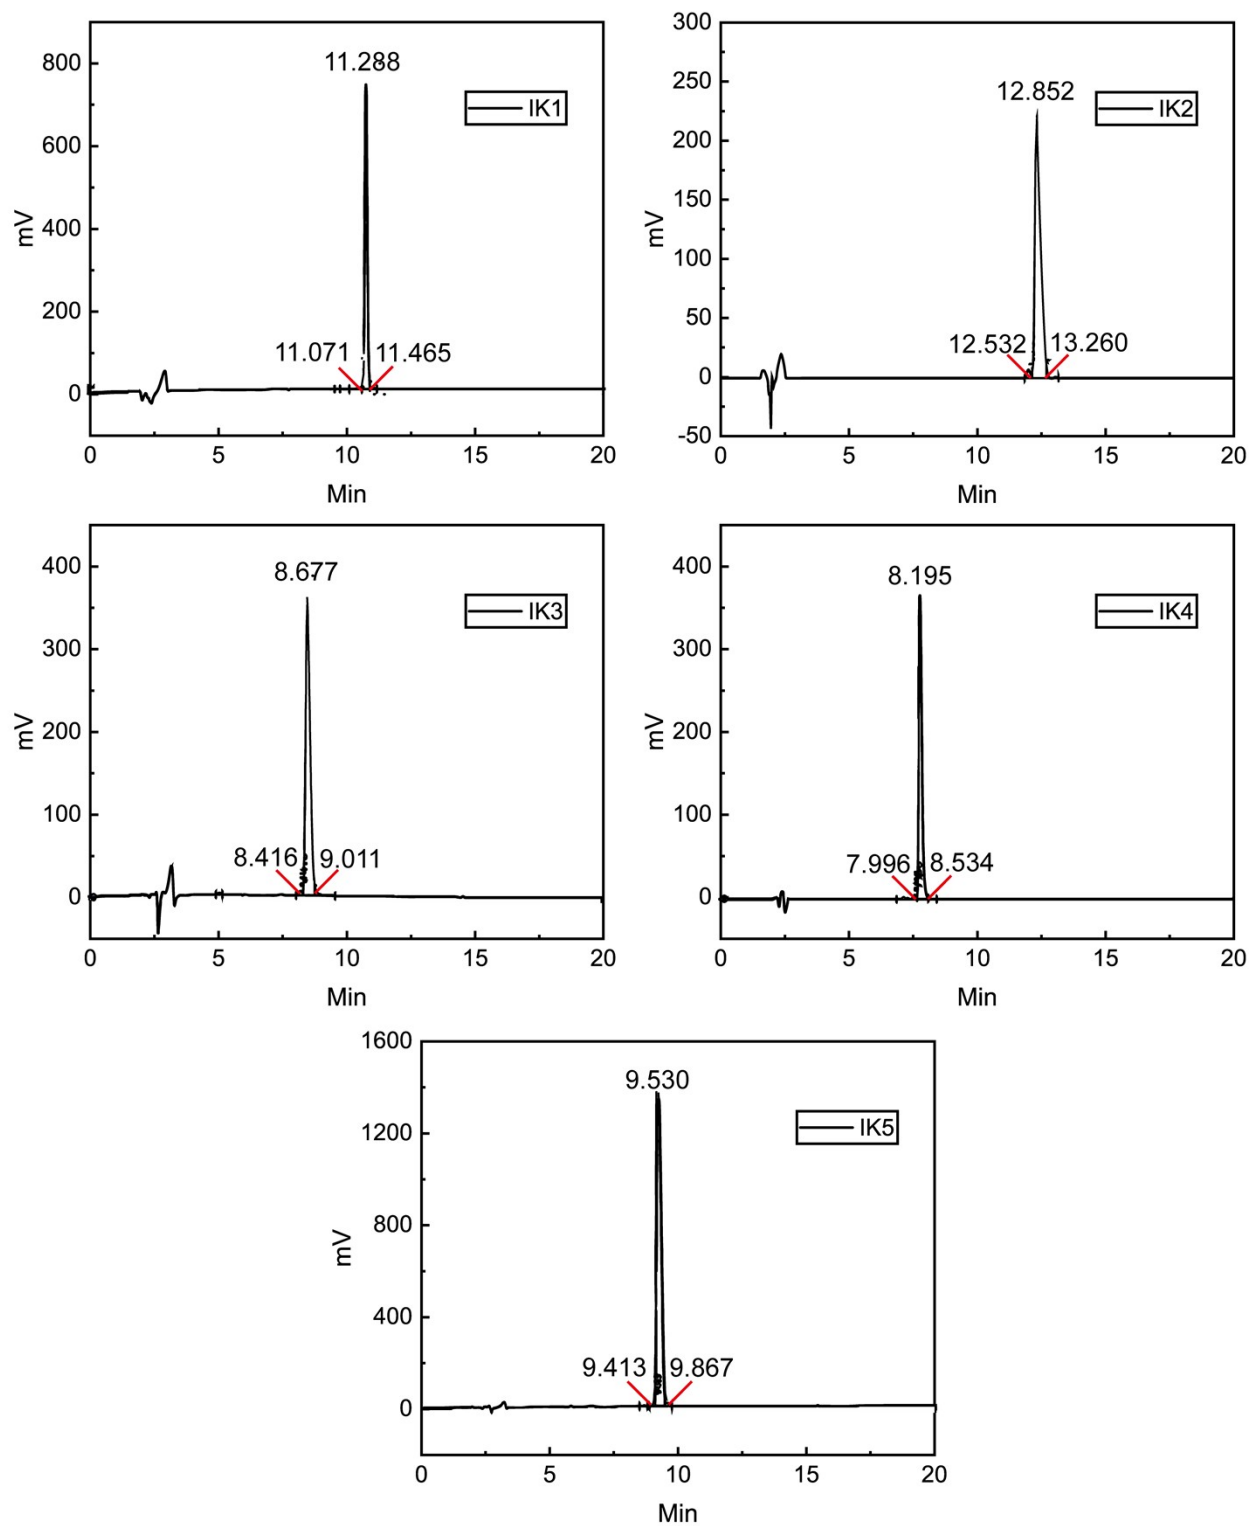

**Figure S1** HPLC chromatograms of the IK1, IK2, IK3, IK4 and IK5 molecules.

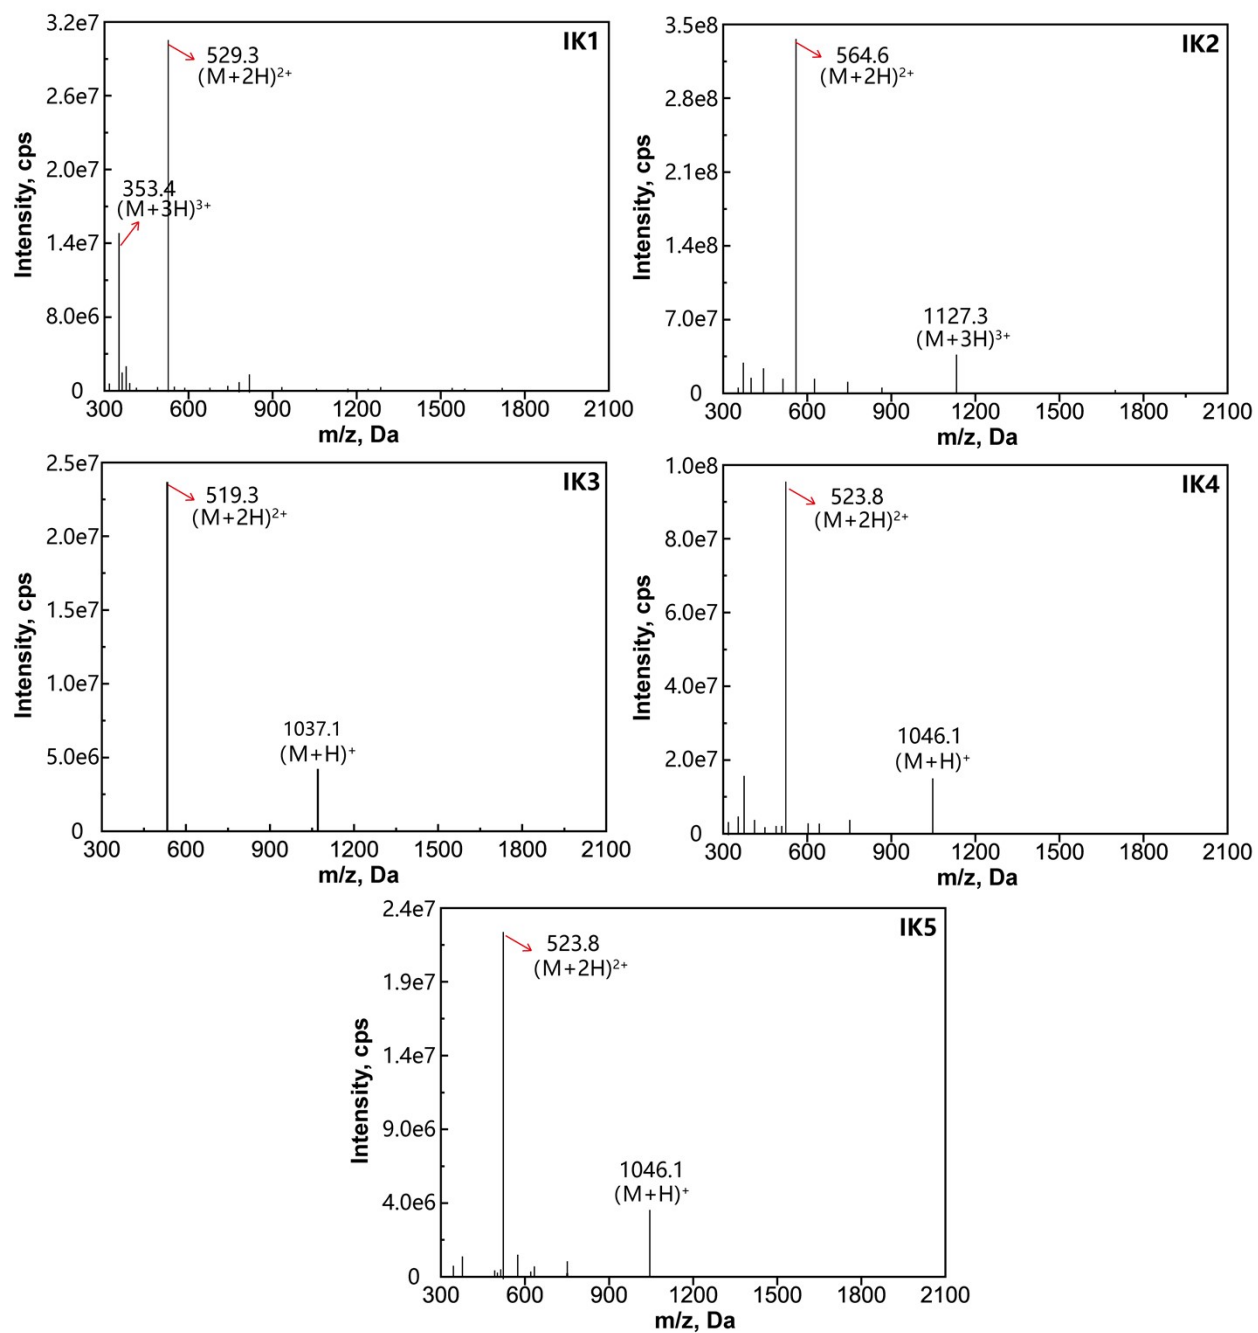

**Figure S2** ESI-MS spectra of IK1, IK2, IK3, IK4 and IK5 molecules.

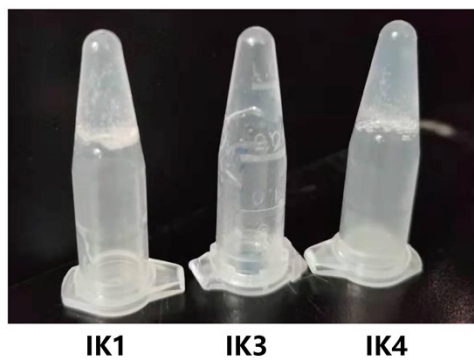

**Figure S3** The optical images of the hydrogels formed by IK1, IK3 and IK4 with a concentration of 4 mg/ml.

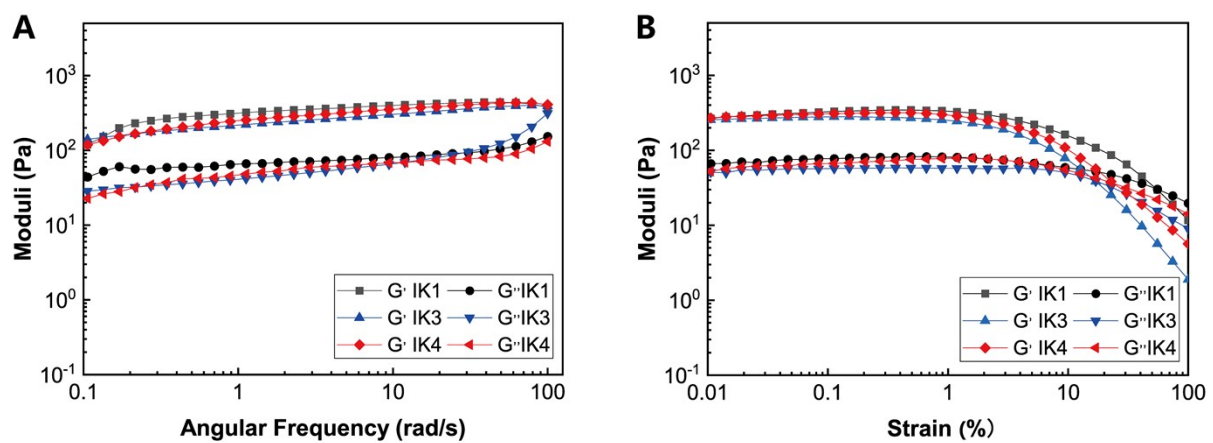

**Figure S4** Mechanical properties of hydrogels by IK1, IK3 and IK4 at 15 mg/ml. a) Frequency sweep and b) strain sweep.

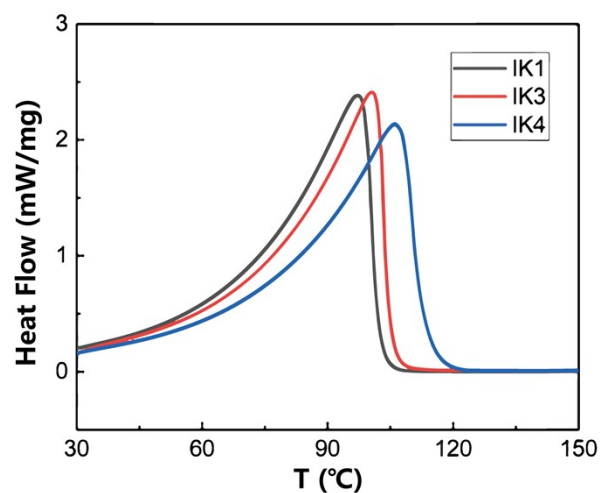

**Figure S5** Differential scanning calorimetric curves of AMP hydrogels. In the test, 10 mg of each hydrogel (formed with a peptide concentration of 20 mg/ml in PBS) was placed in an aluminum crucible of a differential scanning calorimeter (Perkin-Elmer DSC-2). The DSC curves were recorded in the temperature range from 27°C to 150°C with a heating rate of 5 k/min.

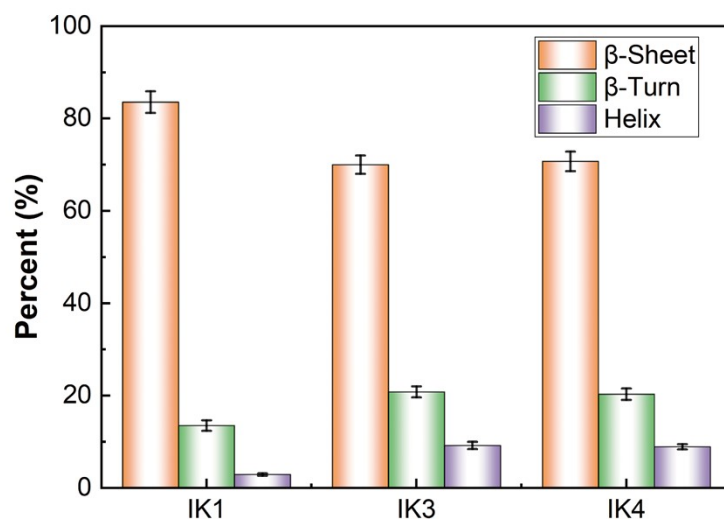

**Figure S6** Histograms of the secondary structures of IK1, IK3 and IK4 peptides measured by circular dichroism.
